# Supplementary material for: PTPN23-dependent ESCRT machinery functions as a cell death checkpoint
Source: PubMed Central journal article supplement — Nat Commun. 2024 Nov 28;15:10364. doi: 10.1038/s41467-024-54749-2 (PMC11604704; doi:10.1038/s41467-024-54749-2), 2024-11-28
Supplement: 41467_2024_54749_MOESM1_ESM.pdf [file 41467_2024_54749_MOESM1_ESM.pdf]

**PTPN23-dependent ESCRT machinery functions as a cell death checkpoint in restraining multiple cell death pathways**

Dongyan Song<sup>1,2</sup>, Yuxin Cen<sup>1,2</sup>, Zhe Qian<sup>1,2</sup>, Xiaoli S. Wu<sup>1,3</sup>, Keith Rivera<sup>1</sup>, Tse-Luen Wee<sup>1</sup>, Osama E. Demerdash<sup>1</sup>, Kenneth Chang<sup>1</sup>, Darryl Pappin<sup>1</sup>, Christopher R. Vakoc<sup>1</sup> and Nicholas K. Tonks<sup>1\*</sup>

**Supplementary Information**

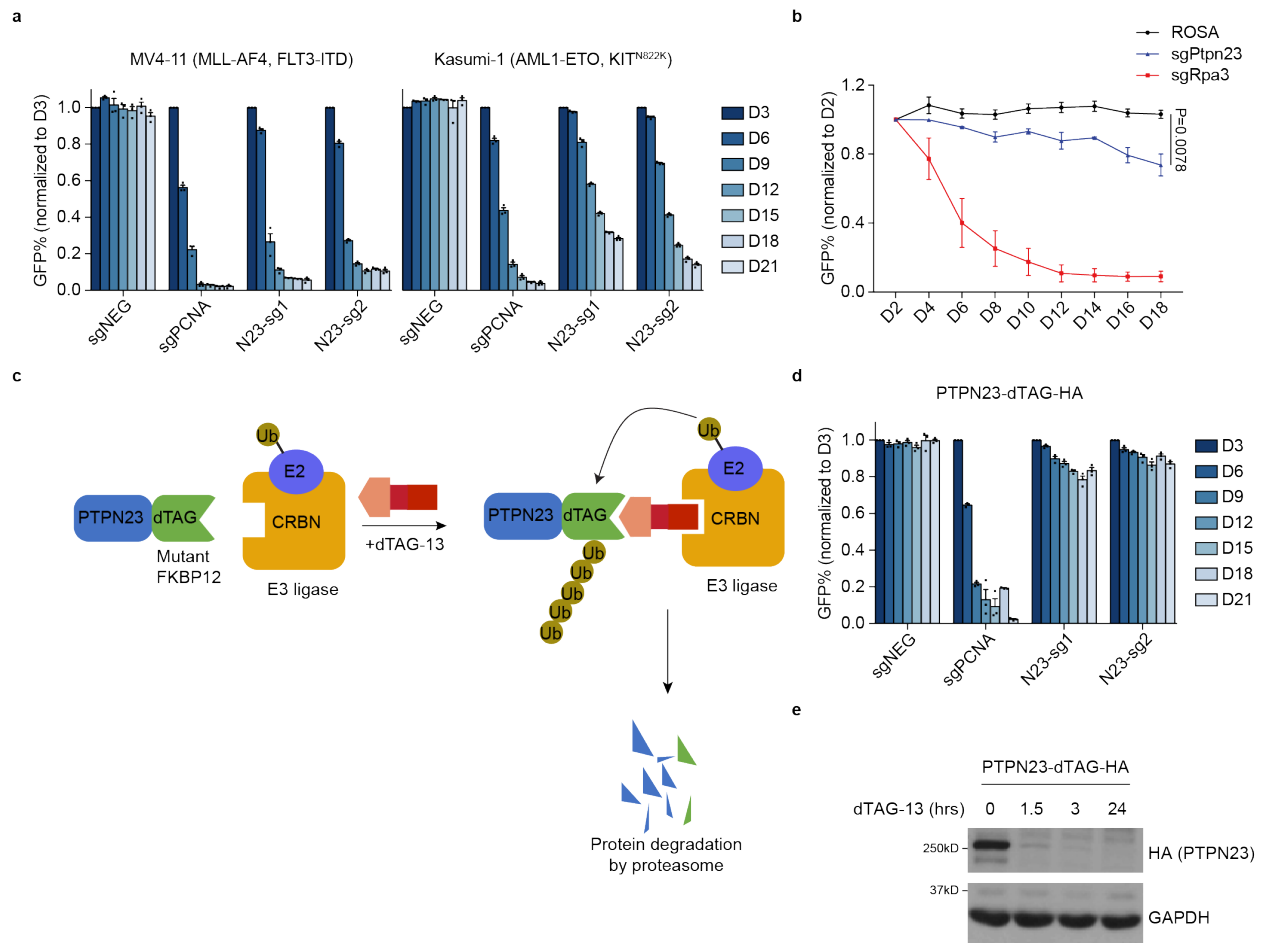

**Supplementary Fig. 1. PTPN23 is required for AML cell survival. Related to Fig. 1.**

**a**, GFP competition growth assays of PTPN23 sgRNA KO in MV4-11 and Kasumi-1 human AML cells (n = 3 independent experiments). **b**, GFP competition growth assay of NIH 3T3 cells with guide RNAs targeting the mouse ROSA locus, Ptpn23, and Rpa3 (n = 3 independent experiments). Data are depicted as mean  $\pm$  SEM. Statistical significance was determined using a two-tailed Wilcoxon matched-pairs signed rank test. **c**, Scheme depiction of the dTAG system. **d**, GFP competition growth assay of NOMO-1 cells stably expressing C-terminally fused dTAG to full-length PTPN23 construct (n = 3 independent experiments). **e**, Immunoblot showing the time course of PTPN23-dTAG-HA degradation upon dTAG-13 treatment (n = 3 independent experiments). Cell were treated with 100nM dTAG-13. Data are presented as mean  $\pm$  SEM.

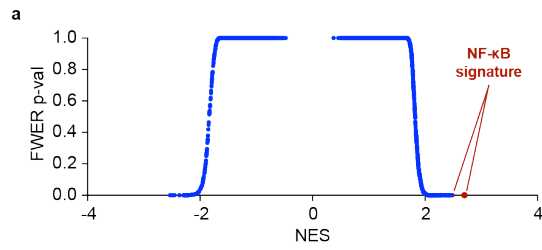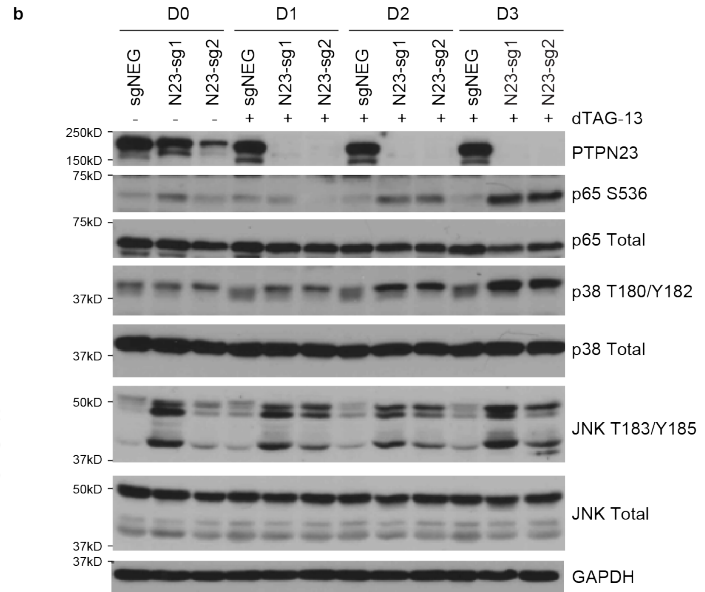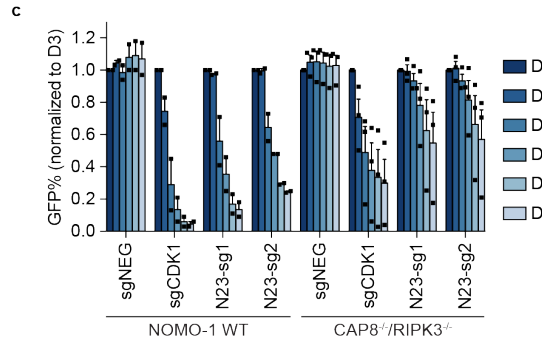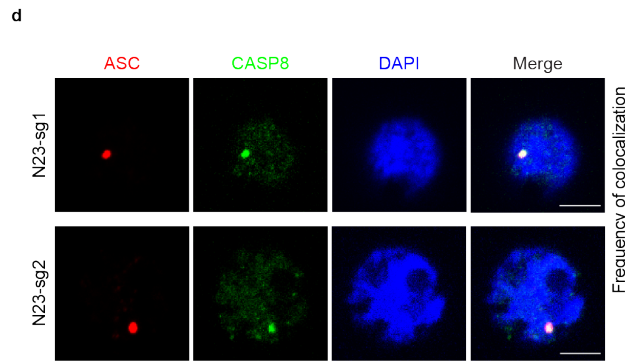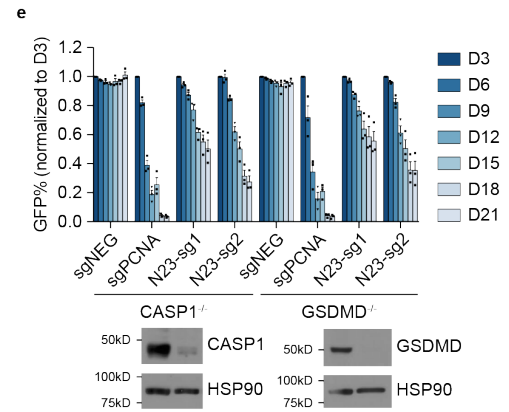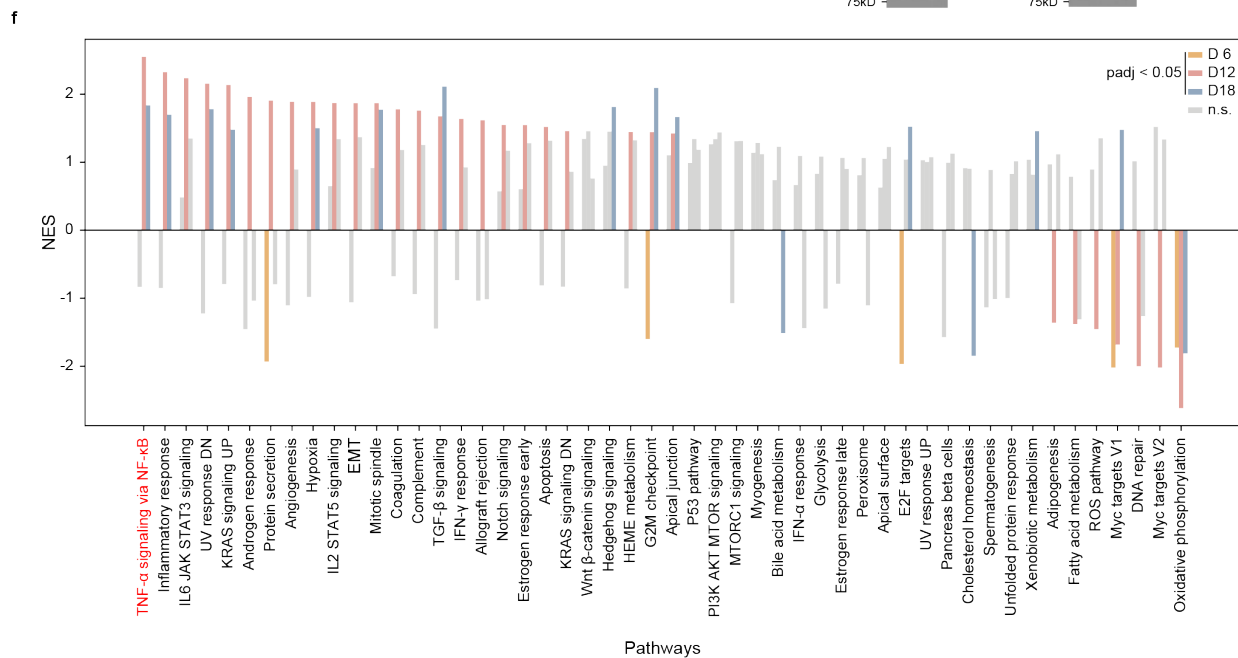

## **Supplementary Fig. 2. PTPN23 depletion led to activation of NF- $\kappa$ B signaling.**

### **Related to Fig. 2.**

**a**, Plot of normalized enrichment score (NES) against family-wise error rate (FWER)  $p$ -value generated from GSEA analysis of 3,591 gene sets. **b**, Immunoblots of p65, p38 and JNK in PTPN23-dTAG NOMO-1 cells treated with 200 nM dTAG-13 for 0-3 days. ( $n = 3$  independent experiments) **c**, GFP competition growth assay performed in the WT or CASP8/RIPK3 double knockout NOMO-1 cells ( $n = 2$  independent experiments for NOMO-1 WT cells and  $n = 3$  independent experiments for CASP8<sup>-/-</sup>RIPK3<sup>-/-</sup> NOMO-1 cells). **d**, Left panel, representative images of immunofluorescence microscopy of ASC and CASP8 in PTPN23-dTAG NOMO-1 cells. Scale bar: 5  $\mu$ m. Right panel, frequency of CASP8 and ASC colocalization upon PTPN23 sgRNA infection ( $n = 3$  independent experiments, and 10 – 14 fields were captured in each experiment.). Data are presented as mean  $\pm$  SEM. **e**, Top, GFP competition growth assays conducted using CASP1 or GSDMD knockout cells ( $n = 3$  independent experiments). Data are presented as mean  $\pm$  SEM. Bottom, Immunoblots of CASP1 and GSDMD in NOMO-1 cells utilized in the top experiments. **f**, Gene set enrichment analysis (GSEA) for 50 Hallmark Gene Sets comparing PTPN23 WT and KO samples across multiple time points post-infection. CASP8/RIPK3/GSDMD triple knockout NOMO-1 cells were infected with sgNEG, N23-sg1 or N23-sg2 lentivirus. RNA-seq data were derived from two biological replicates per sample, contrasting PTPN23 WT and KO samples at Day 6, 12, and 18 post-infection.

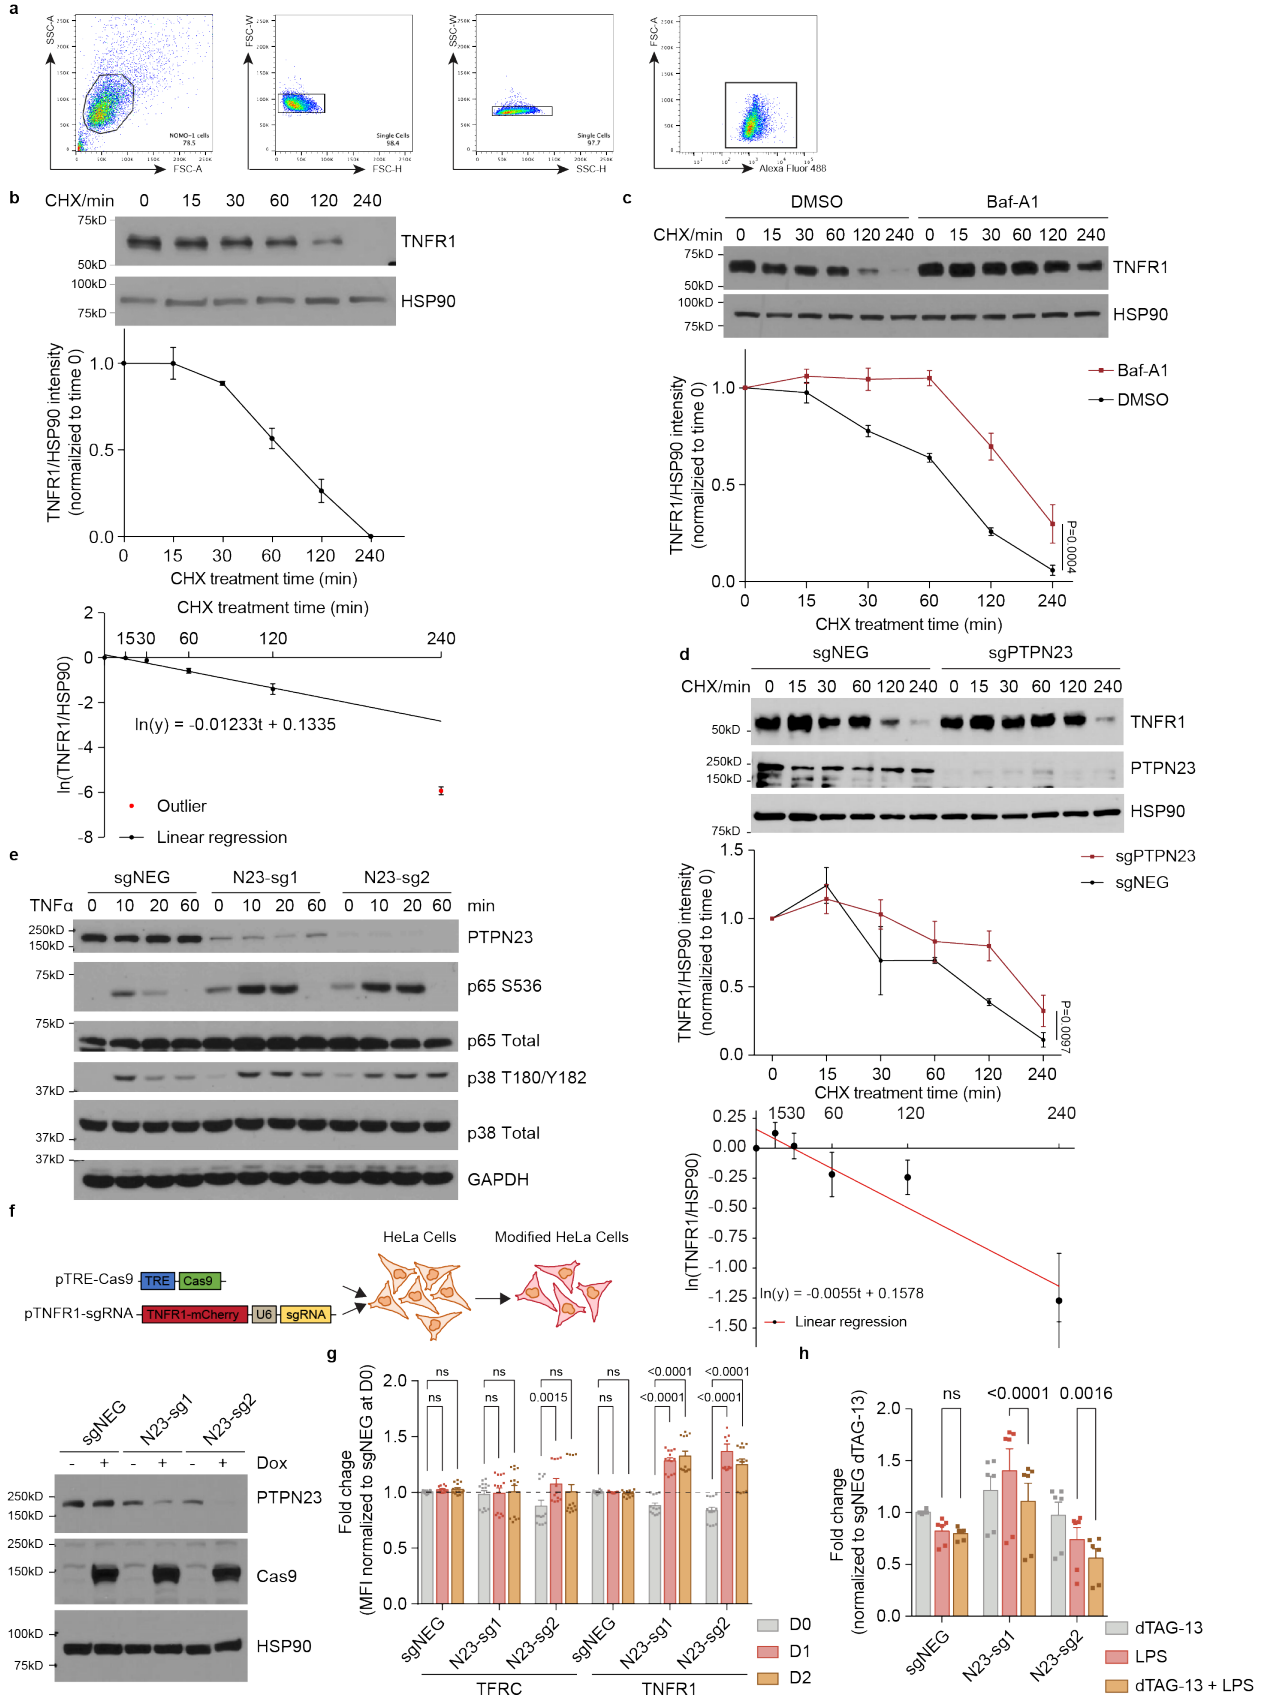

### Supplementary Fig. 3. Modulation of receptor regulation upon PTPN23 depletion.

#### Related to Fig. 3.

**a**, Gating strategy for flow cytometric analysis used to quantify the expression levels of TNFR1, FAS, DR4, DR5, TLR4, and TFRC as presented in this manuscript. **b**, Top, immunoblots of endogenous TNFR1 following CHX treatment in NOMO-1 cells. Middle, quantification of TNFR1/HSP90 intensity, n=3 independent experiments. Bottom, natural logarithm-transformed TNFR1/HSP90 ratio against time, utilized for calculating half-life ( $t_{1/2}$ ). The  $t_{1/2}$  equation:  $t_{1/2} = (\ln(0.5) - 0.1335)/-0.01233$ . The data point at 240 min was excluded due to intensity falling below the immunoblotting detection level. **c**, Top, immunoblots of TNFR1 following CHX treatment. NOMO-1 cells were pretreated with DMSO or 250 nM Baf-A1 for 2 hours. Bottom, quantification of TNFR1/HSP90 intensity, n = 3 independent experiments. **d**, Top, immunoblots of endogenous TNFR1 following CHX treatment in PTPN23-dTAG NOMO-1 cells. Prior to CHX treatment, the cells were treated with 200 nM dTAG-13 for 24 hours. Middle, quantification of TNFR1/HSP90 intensity, based on three independent experiments. Bottom, natural logarithm-transformed TNFR1/HSP90 ratio against time. The  $t_{1/2}$  equation:  $t_{1/2} = (\ln(0.5) - 0.1578)/-0.0055 = 154.7 \pm 25.4$  minutes. **e**, Immunoblots of p65 and p38 in NOMO-1 cells transfected with negative control sgRNA or two PTPN23 sgRNAs. Cells were stimulated with 20 ng/ml TNF- $\alpha$  for the indicated time at day 6 post-infection (n = 3 independent experiments). **f**, Top, schematic depiction of engineered HeLa cells. Bottom, immunoblots of PTPN23 in modified HeLa cells treated with 1  $\mu$ g/ml doxycycline (Dox) or vehicle control for 5 days (n = 3 independent experiments). **g**, Fold changes of TFRC and TNFR1 measured by flow cytometry in PTPN23-dTAG NOMO-1 cells treated with 200 nM dTAG-13 over 0-2 days. The dataset comprises n = 13 samples across 3 independent experiments. **h**, Cytotoxicity of LPS in PTPN23-dTAG NOMO-1 cells. Cells were incubated with 1  $\mu$ M dTAG-13 or 1  $\mu$ g/ml LPS as indicated for 48 hours, and cell viability was measured using CTG assay (n = 6, 3 independent experiments). Data are presented as mean  $\pm$  SEM. Statistical analysis for **b**, **c**, **d**, **g**, and **h** by two-way ANOVA, Tukey's multiple comparisons test.

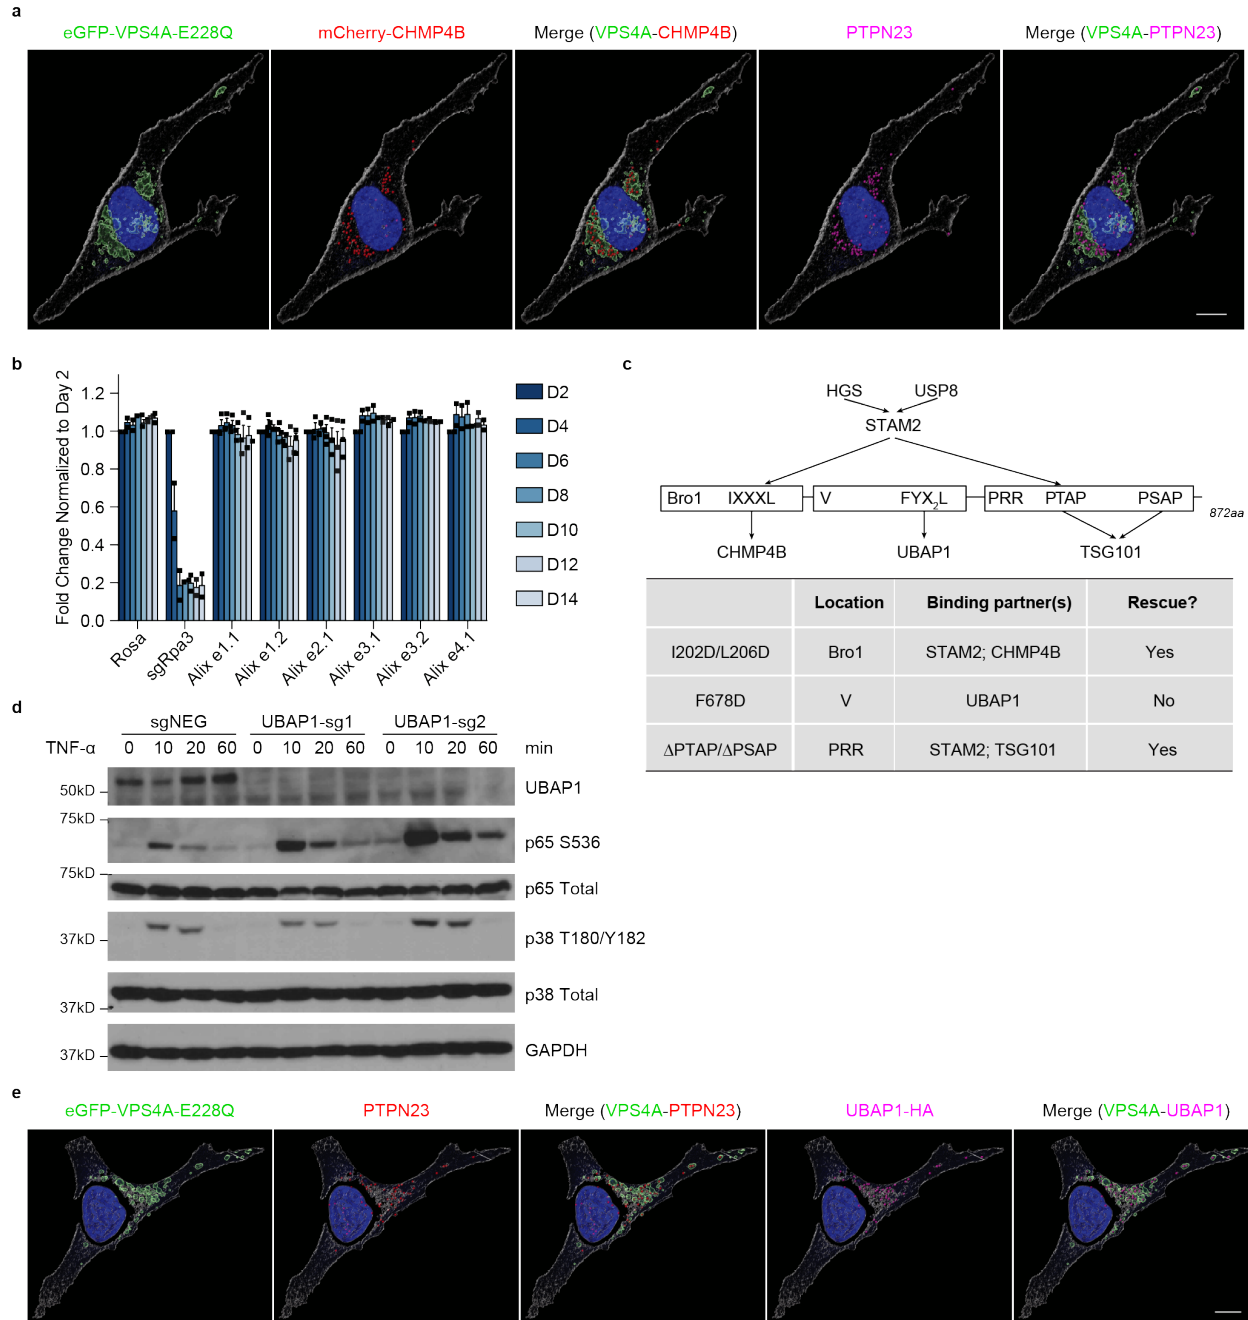

**Supplementary Fig. 4. The essential role of PTPN23 was dependent on its V domain through interacting with UBAP1. Related to Fig. 4.**

**a**, The 3D reconstructions of Fig. 4a showing the construction of eGFP-VPS4A-E228Q surfaces, mCherry-CHMP4B and PTPN23 spots. Scale bar: 10  $\mu$ m. **b**, GFP competition growth assay of *Alix* knockout in RN2 cells (n = 2 independent experiments for Rosa,

sgRpa3, Alix e3.1, Alix3.2, and Alix e4.1; n = 3 independent experiments for Alix e1.1, Alix e1.2, and Alix e2.1). Data are presented as mean  $\pm$  SEM. **c**, Top, summary of the ESCRT components binding to PTPN23 and the corresponding interaction motifs. Bottom, the ability of PTPN23 mutants to compensate *Ptpn23* knockout in RN2 cells. **d**, Immunoblotting analysis of p65 and p38 phosphorylation in response to UBAP1 depletion. NOMO-1 cells were stimulated with 20 ng/ml TNF- $\alpha$  for the indicated time at day 6 post sgRNA infection (n = 3 independent experiments). **e**, The 3D reconstructions of Fig. 4g showing the construction of eGFP-VPS4A-E228Q surfaces, PTPN23 and UBAP1-HA spots. Scale bar: 10  $\mu$ m.



**a**

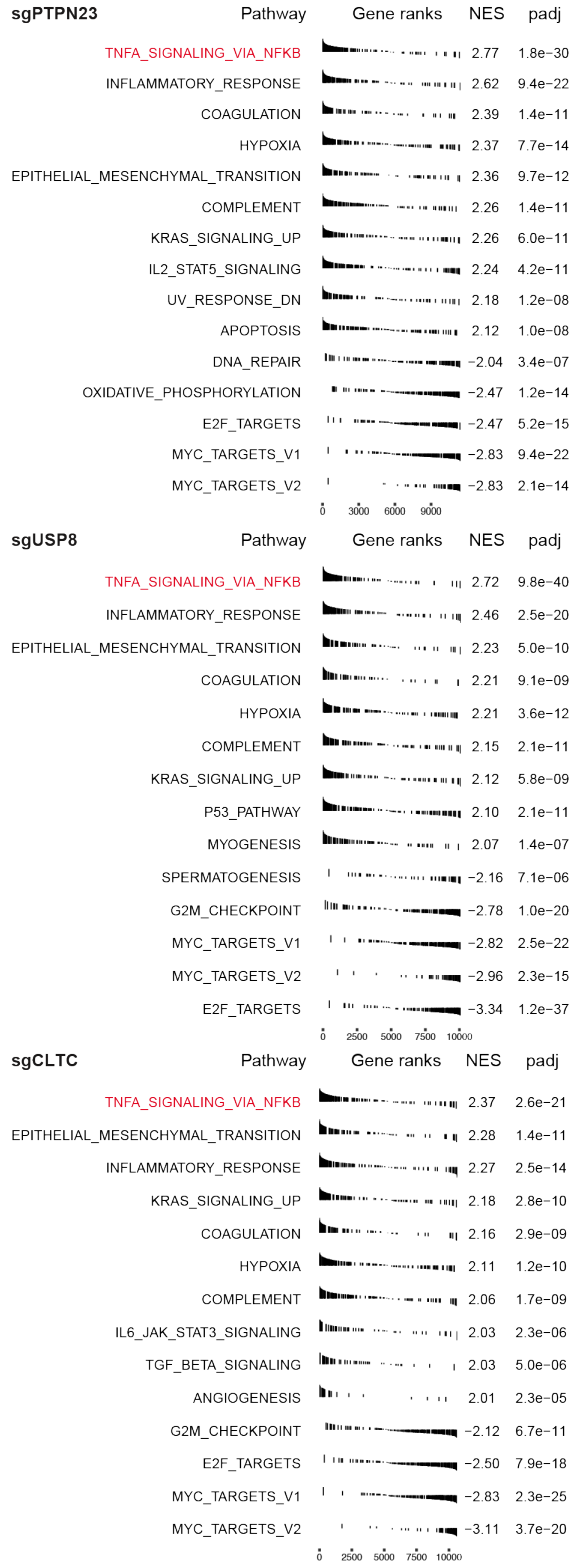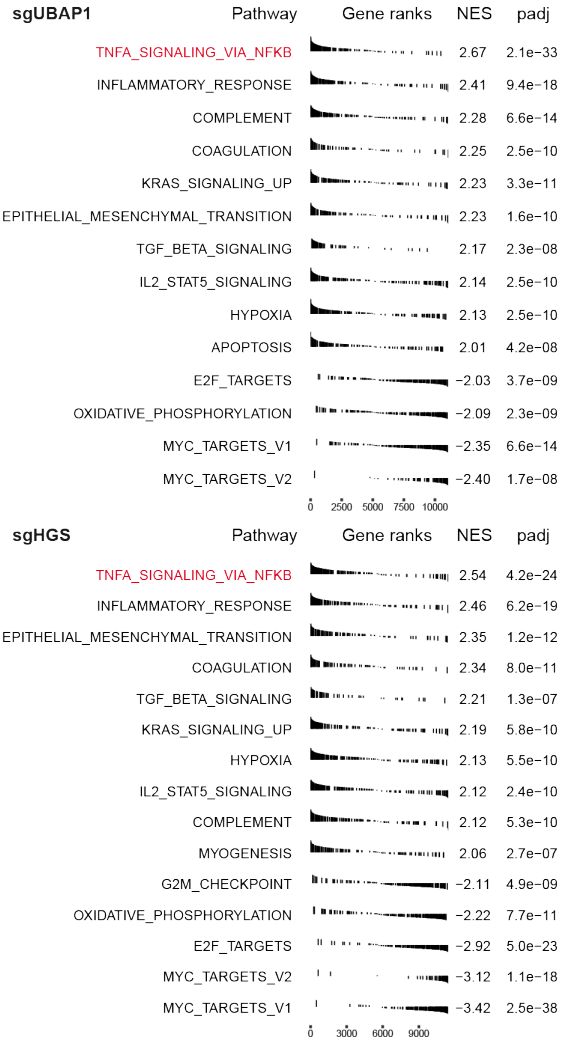

**b**

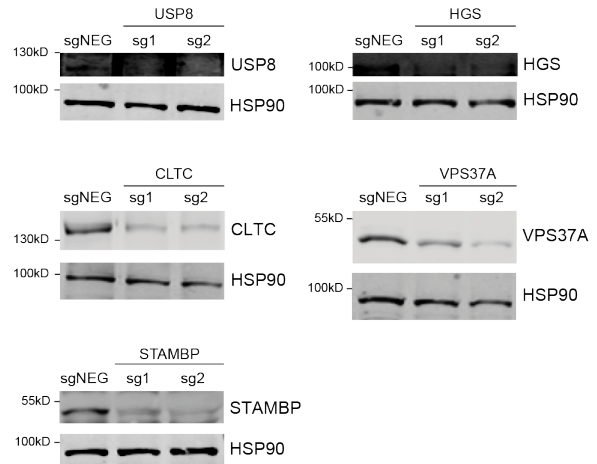

**Supplementary Fig. 5. GSEA pathway enrichment and immunoblot analysis of PTPN23 and its co-dependent gene knockouts. Related to Fig. 5.**

- a. Enrichment plots for pathways with NES > 2 or < -2 from GSEA Hallmark analysis in RNA-seq comparing PTPN23 or its co-dependent gene knockouts to negative controls.
- b. Immunoblotting analysis of NOMO-1 cells infected with sgNEG or sgRNAs targeting the indicated genes (n = 3 independent experiments). Cells were harvested 5 days post-infection.

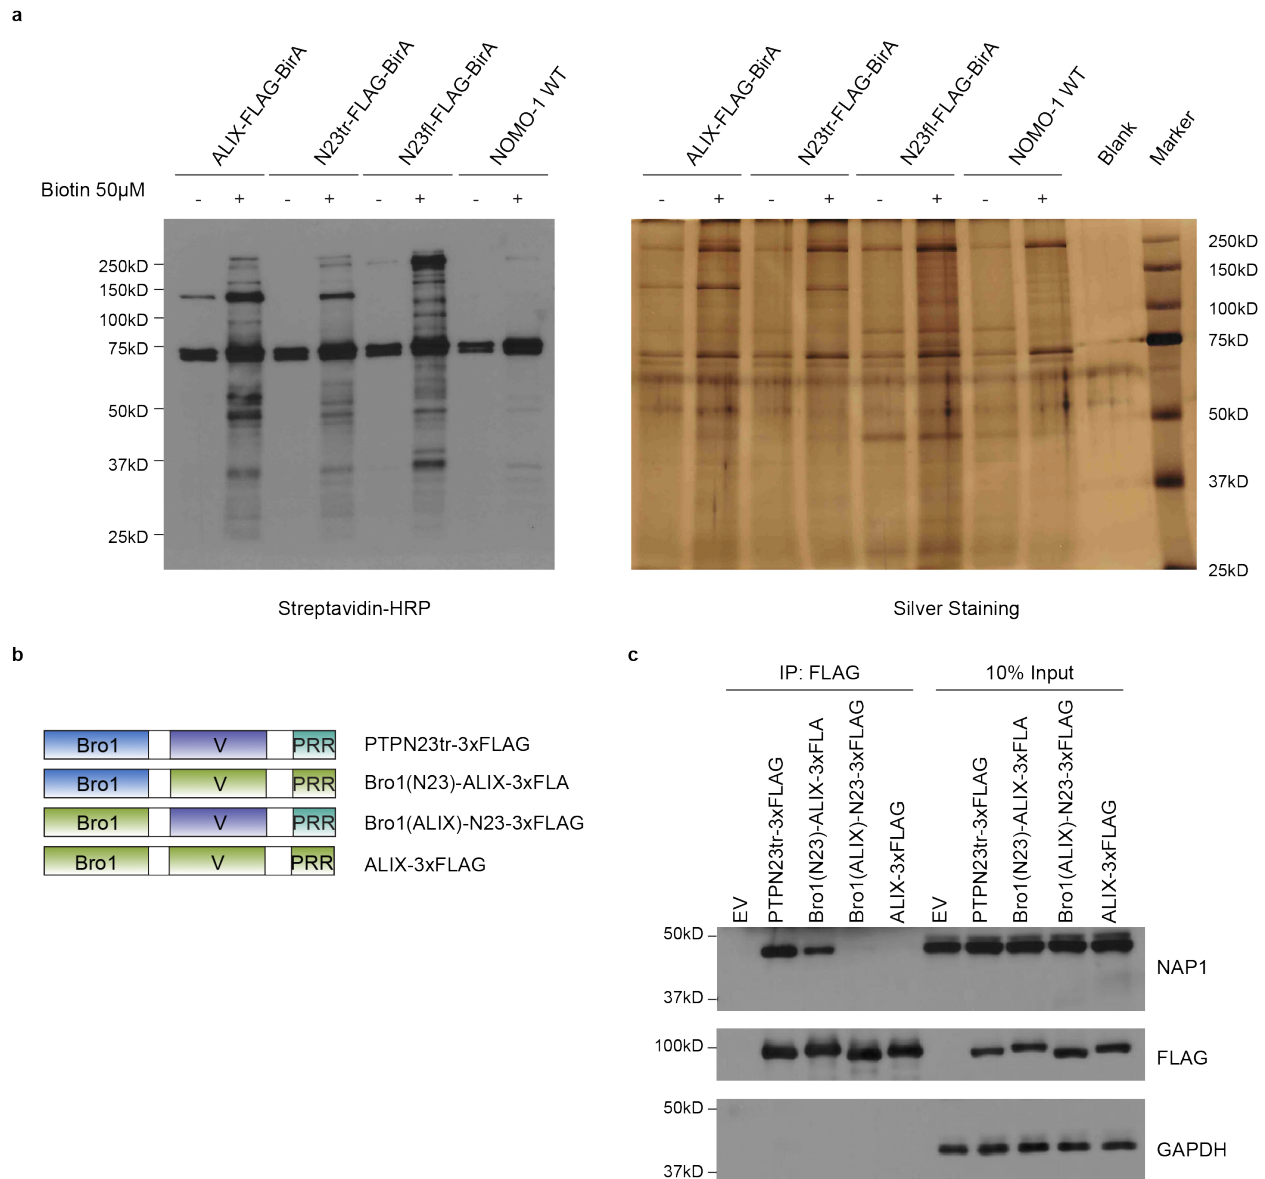

**Supplementary Fig. 6. The Bro1 domain of PTPN23 binds to NAP1. Related to Fig. 6.**

**a**, Representative blots to examine the quality of samples prior to MS analysis (n = 3 independent experiments). The left panel shows immunoblot results, and the right panel displays silver staining. **b**, Schematic representation of PTPN23tr, ALIX and chimeric proteins. **c**, Immunoprecipitation assay of endogenous NAP1 and overexpressed PTPN23tr, ALIX or PTPN23/ALIX chimeras in HEK 293T cells (n = 3 independent experiments). Indicated plasmids were transiently transfected into HEK 293T cells, and cells were harvested 48 hours post-transfection.

**a**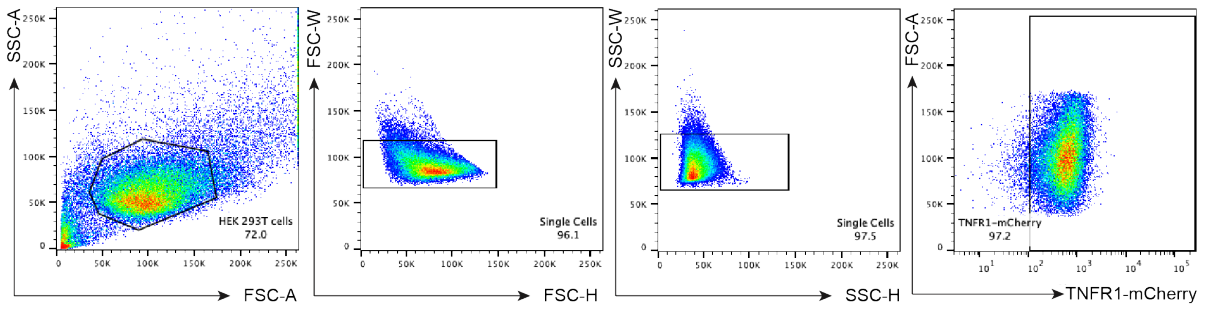**b**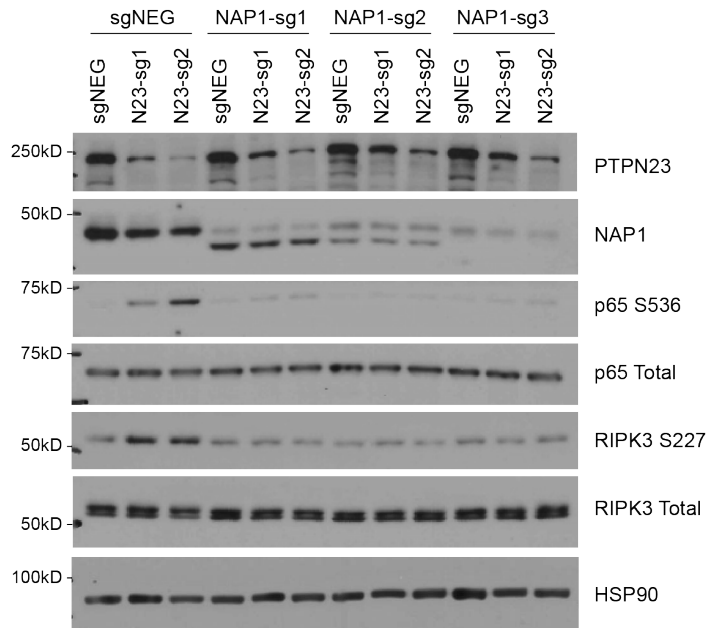**c**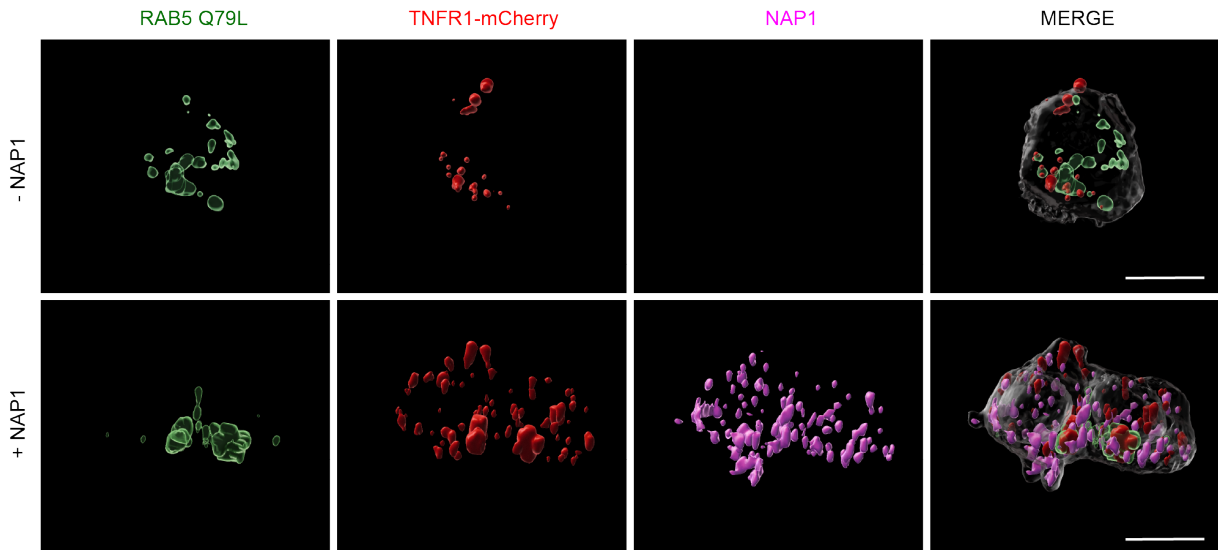

**Supplementary Fig. 7. The impact of NAP1 on TNFR1 signaling regulation. Related to Fig. 7.**

**a**, Gating strategy for flow cytometric analysis of mCherry-TNFR1 level. **b**, Immunoblots of p65 and RIPK3 examined upon PTPN23 depletion in the WT or NAP1-knockout NOMO-1 cells. Following infection with negative control or two PTPN23 sgRNAs, cells were harvested 6 days post-infection, with subsequent examination of p65 and RIPK3 phosphorylation status (n = 3 independent experiments). **c**, The 3D rendered images of Fig. 7e. Scale bar: 10  $\mu$ m.
