# Supplementary material for: PTPN23-dependent ESCRT machinery functions as a cell death checkpoint
Source: PubMed Central journal article supplement — Nat Commun. 2024 Nov 28;15:10364. doi: 10.1038/s41467-024-54749-2 (PMC11604704; doi:10.1038/s41467-024-54749-2), 2024-11-28
Supplement: 41467_2024_54749_MOESM2_ESM.pdf [file 41467_2024_54749_MOESM2_ESM.pdf]

## **Description of Additional Supplementary Files**

File Name: **Supplementary Data 1**

Description: List of sgRNA sequences of the pooled PTP CRISPR library. Related to Fig. 1.

File Name: **Supplementary Data 2**

Description: Log2 frequency changes of sgRNAs targeting the same gene at Days 2 and 14 post-sgRNA transduction. Related to Fig. 1

File Name: **Supplementary Data 3**

Description: Mass spectrometry identification of biotinylated proteins labeled by BirA\*-tagged ALIX or PTPN23. Related to Fig. 6.

File Name: **Supplementary Data 4**

Description: List of sgRNA sequences used in the validation study. Related to Fig. 1-7.

File Name: **Supplementary Data 5**

Description: List of antibodies used for immunoblotting, confocal imaging, and flow cytometry, including their sources and dilutions.
